# Supplementary material for: Study on the effect of N–H–O co-doping on diamond growth and its mechanism under HPHT by FeNi solvent
Source: Royal Society of Chemistry journal article supplement (doi:10.1039/d1ce01666k), 2022-01-01
Supplement: d1ce01666k1.pdf [file d1ce01666k1.pdf]

## Supporting Information for Effect of $C_6H_5NO_2$ on diamond synthesis by FeNi catalyst under high temperature and high pressure

Zhenghao Cai <sup>a</sup>, Ming Li<sup>a</sup>, Liangchao Chen <sup>b,\*</sup>, Shuai Fang <sup>a</sup>, Zhiwen Wang <sup>a</sup>,  
Hongyu Zhao <sup>a</sup>, Hongan Ma <sup>a,\*</sup> and Xiaopeng Jia <sup>a,\*</sup>

a. State Key Lab of Super-hard Materials, Jilin University, Changchun 130012, Jilin, China. E-mail: maha@jlu.edu.cn, jiexp@jlu.edu.cn; Fax: +86 431 85168881; Tel: +86 431 85168881.

b. Key Laboratory of Material Physics of Ministry of Education and School of Physical Engineering, Zhengzhou University, Zhengzhou 450001, Henan, China. E-mail: chenlc@zzu.edu.cn; Tel: +86-371-67780665.

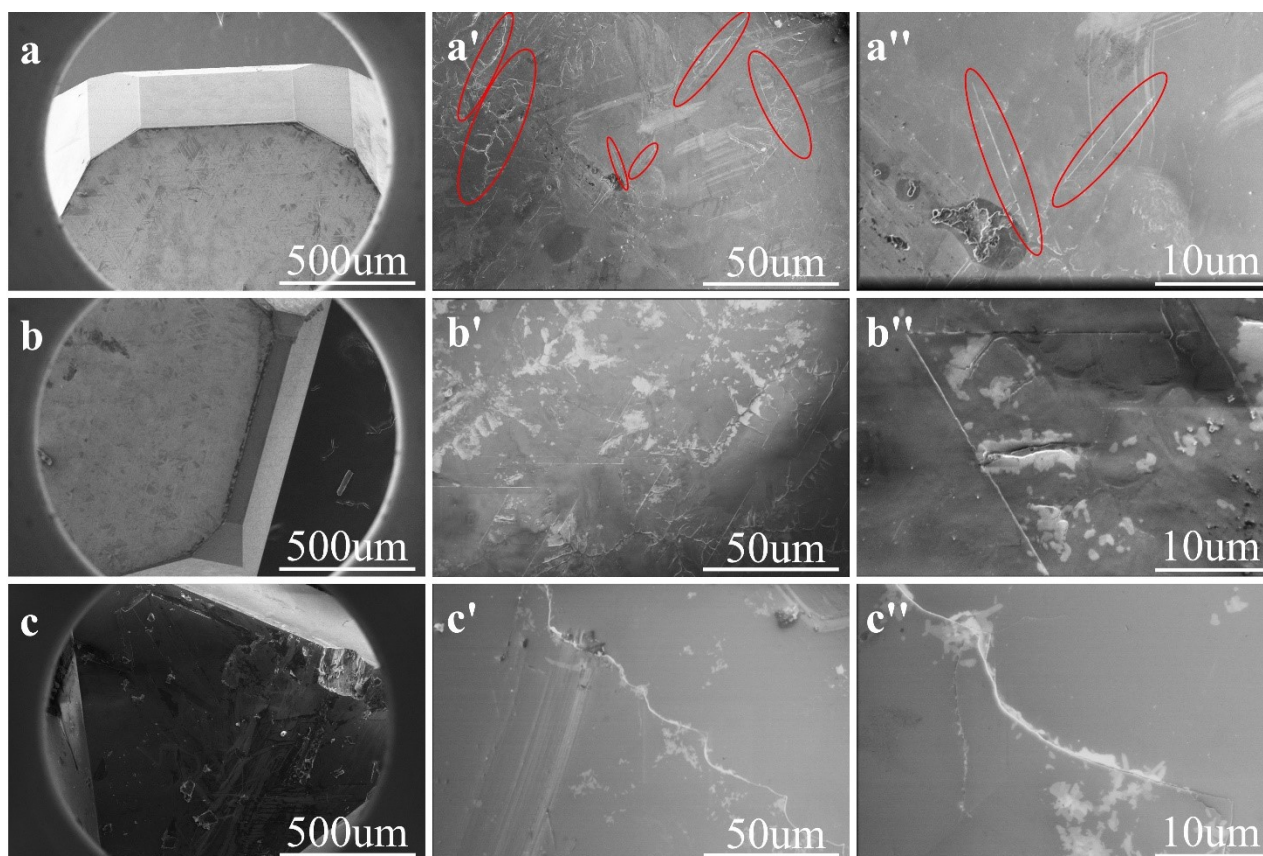

Fig. S1 SEM images of the diamond crystals grown from the Fe-Ni-C system with: (a) 0.1 wt%, (b) 0.2% wt%, (c) 0.8wt%  $C_6H_5NO_2$  additive; (a', a'') partial magnification of (a), (b', b'') partial magnification of (b) and (c', c'') partial magnification of (c).

---

The concentration of nitrogen in C-center form ( $N_C$ ) and nitrogen in A-center form ( $N_A$ ) are calculated by following formula: <sup>[1-4]</sup>

$$N_C/\text{ppm} = 25.0 \alpha_C; \alpha_C = 1.1 \alpha_{1130} - 0.2 \alpha_{1282};$$

$$N_A/\text{ppm} = 16.5 \alpha_A; \alpha_A = 1.1 \alpha_{1282} - 0.2 \alpha_{1130};$$

$\alpha_{1130}$  and  $\alpha_{1282}$  were absorption coefficients calculated as follows:

$$\alpha_{1130} = \mu (1130\text{cm}^{-1})/\mu (2000\text{cm}^{-1}) \times 12.3;$$

$$\alpha_{1282} = \mu (1282\text{cm}^{-1})/\mu (2000\text{cm}^{-1}) \times 12.3;$$

$\mu (1130\text{cm}^{-1})$ ,  $\mu (2000\text{cm}^{-1})$  and  $\mu (1282\text{cm}^{-1})$  were absorption intensity could be calculated according to the recorded value A in FTIR spectra:

$$\mu (1130 \text{ cm}^{-1}) = A (1130\text{cm}^{-1}) - A (1370\text{cm}^{-1}),$$

$$\mu (2000\text{cm}^{-1}) = A (2000\text{cm}^{-1}) - A (1370\text{cm}^{-1}),$$

$$\mu (1282 \text{ cm}^{-1}) = A (1282\text{cm}^{-1}) - A (1370\text{cm}^{-1}).$$

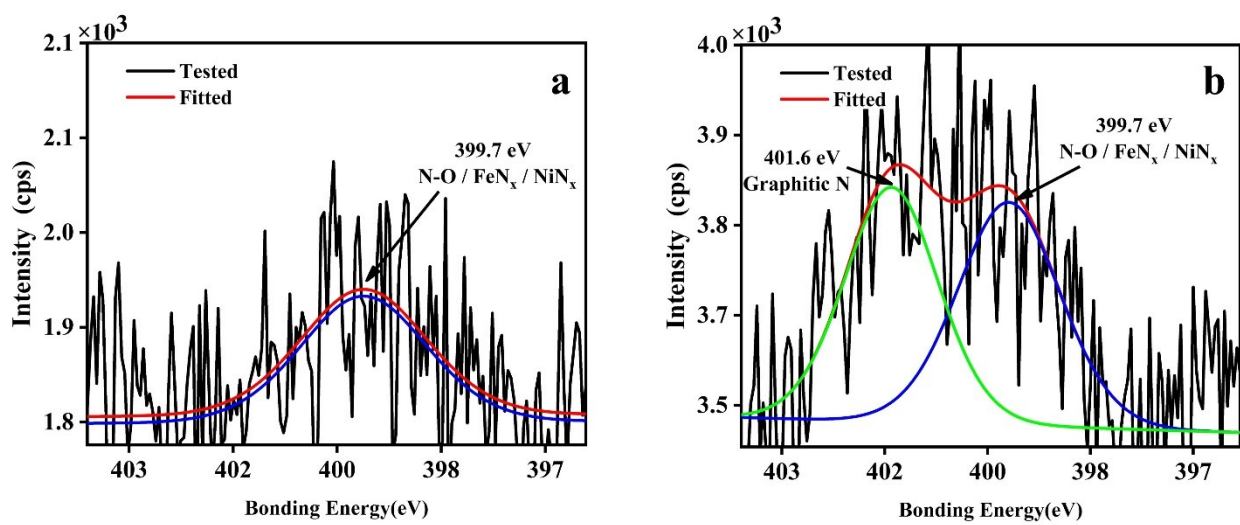

Fig. S2 High-resolution N 1s XPS spectrum of the diamonds synthesized in the FeNi-C system without  $C_6H_5NO_2$  (a) and with 1.6wt.%  $C_6H_5NO_2$  additive (b).

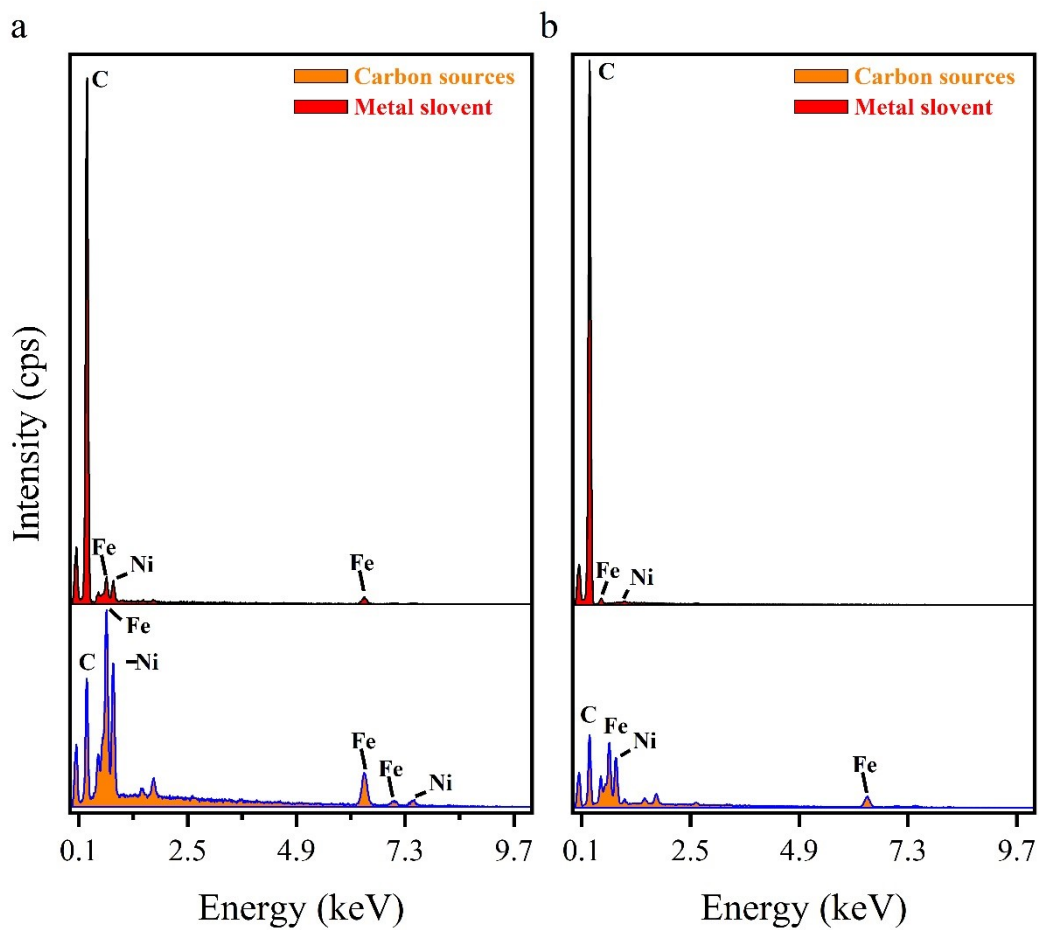

Fig. S3 Energy spectrum test results of carbon sources (The upper part of the figure) and metal solvent (the bottom of the figure): a) without doping; b) doped with 0.8% C<sub>6</sub>H<sub>5</sub>NO<sub>2</sub>.

---

## Reference:

(1) Boyd, S. R.; Kiflawi, I.; Woods, G. S., Infrared absorption by the B nitrogen aggregate in diamond. *Philosophical Magazine Part B* **1995**, 72, 351-361.

(2) Chepurova, A. A.; Dereppe, J. M.; Fedorov, I. I.; Chepurov, A. I., The change of Fe-Ni alloy inclusions in synthetic diamond crystals due to annealing. *Diamond and Related Materials* **2000**, 9, 1374-1379.

(3) Huang, G.-F.; Jia, X.-P.; Li, Y.; Hu, M.-H.; Li, Z.-C.; Yan, B.-M.; Ma, H.-A., Growth of gem-grade nitrogen-doped diamond crystals heavily doped with the addition of  $\text{Ba}(\text{N}_3)_2$ . *Chinese Physics B* **2011**, 20, (7), 5.

(4) Kiflawi, I.; Mayer, A. E.; Spear, P. M.; Van Wyk, J. A.; Woods, G. S., Infrared absorption by the single nitrogen and A defect centres in diamond. *Philosophical Magazine B* **2006**, 69, (6), 1141-1147.
